# Supplementary material for: Atomic-scale Ru anchored on chromium-shavings as a precursor for a pH-universal hydrogen evolution reaction electrocatalyst
Source: Royal Society of Chemistry journal article supplement (doi:10.1039/d3mh01951a), 2024-01-01
Supplement: d3mh01951a1.pdf [file d3mh01951a1.pdf]

**Atomic-Scale Ru Anchored on Chromium-Shavings as Precursor for pH-  
Universal Hydrogen Evolution Reaction Electrocatalyst**

Qingxin Han<sup>a#\*</sup>, Qiangqiang Lu<sup>a#</sup>, Xuechuan Wang<sup>a,b</sup>, Chao Wei<sup>a</sup>, Xiaoyu Guan<sup>a\*</sup>, Luming Chen<sup>a</sup>,

Xiao Wang<sup>a</sup>, & Ji Li<sup>a\*</sup>

<sup>a</sup> *College of Bioresources Chemical and Materials Engineering, Shaanxi University of Science & Technology, Xi'an 710021, Shaanxi, China*

<sup>b</sup> *Key Laboratory of Auxiliary Chemistry and Technology for Chemical Industry, Ministry of Education & Shaanxi Collaborative Innovation Center of Industrial Auxiliary Chemistry and Technology, Shaanxi University of Science and Technology, Xi'an, 710021, China*

<sup>#</sup> *These authors contributed to the work equally and should be regarded as co-first authors.*

\*E-mail: [hanqingxin@sust.edu.cn](mailto:hanqingxin@sust.edu.cn)

\*E-mail: [xiaoyu.guan@a.riken.jp](mailto:xiaoyu.guan@a.riken.jp)

\*E-mail: [liji@sust.edu.cn](mailto:liji@sust.edu.cn)

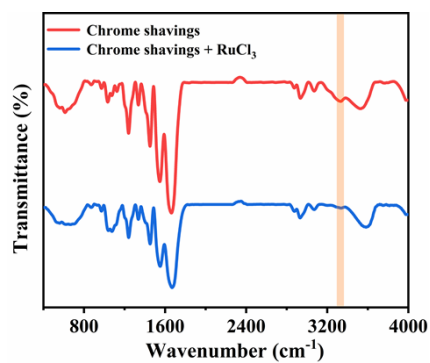

**Fig. S1.** FT-IR spectra of chrome shavings and chrome shavings were loaded with  $\text{RuCl}_3$ .

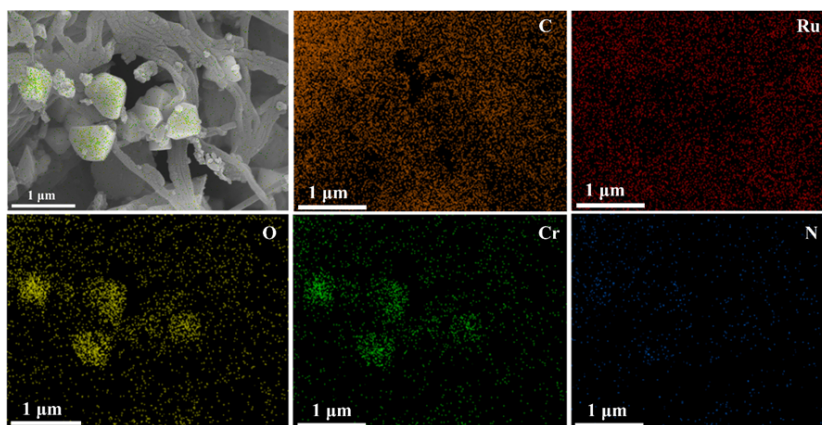

**Fig. S2.** SEM image and corresponding EDX elemental mapping of C, Ru, O, Cr and N.

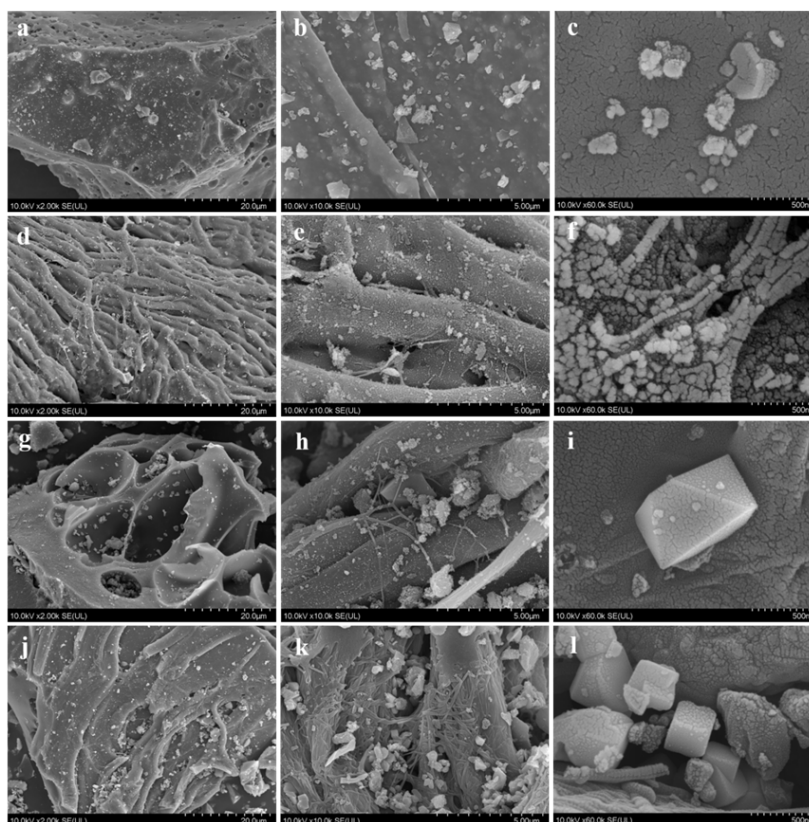

**Fig. S3.** (a-c) SEM image of CN/Ru-1; (d-f) SEM of CN/ $\text{Cr}_2\text{O}_3$ /Ru-0.1; (g-i) SEM of CN/ $\text{Cr}_2\text{O}_3$ /Ru-5; (j-l) SEM of CN/ $\text{Cr}_2\text{O}_3$ /Ru-10.

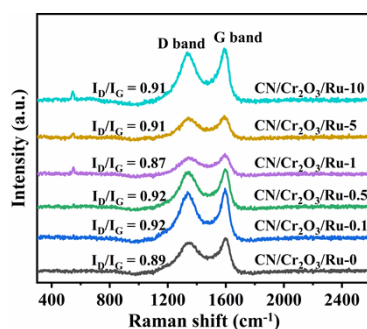

Fig. S4. Raman spectra of catalyst samples.

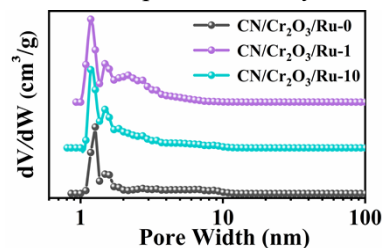

Fig. S5. Pore size distribution of the sample.

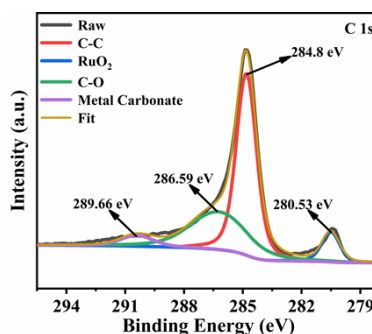

Fig. S6. XPS of CN/Cr<sub>2</sub>O<sub>3</sub>/Ru-1 for C 1s regions.

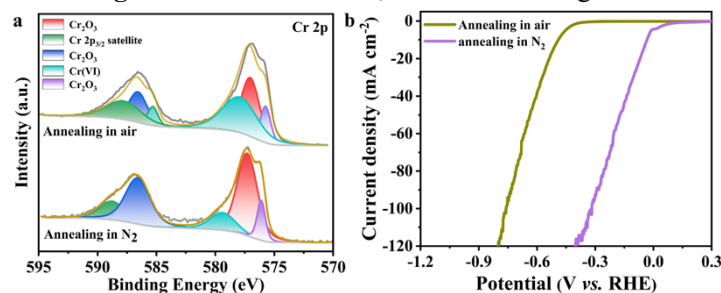

Fig. S7. (a) The change of Cr (VI) content is in Cr 2p; (b) Comparison of LCV curves with different Cr (VI) contents.

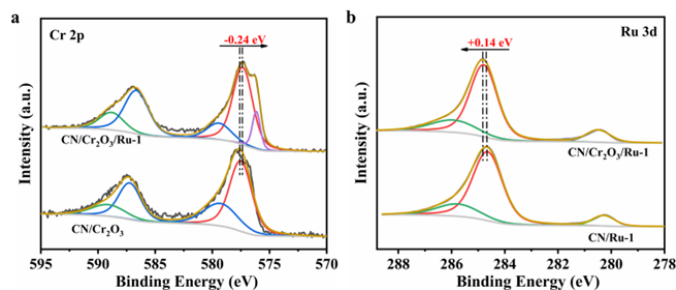

Fig. S8. The changes of Cr 2p (a) and Ru 3d (b) orbitals of CN/Cr<sub>2</sub>O<sub>3</sub>/Ru-1 and CN/Ru-1, CN/Cr<sub>2</sub>O<sub>3</sub>.

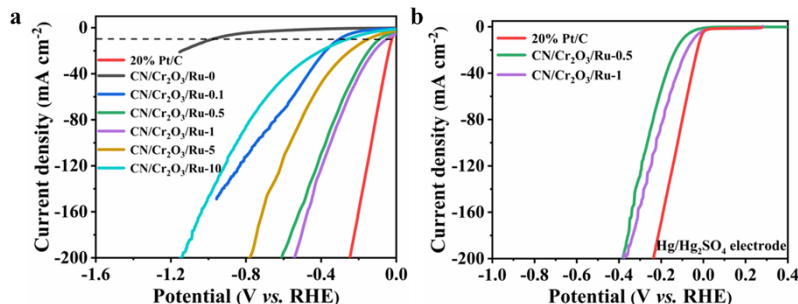

**Fig. S9.** (a) LSV polarization curves of CN/Cr<sub>2</sub>O<sub>3</sub>/Ru-0, CN/Cr<sub>2</sub>O<sub>3</sub>/Ru-0.1, CN/Cr<sub>2</sub>O<sub>3</sub>/Ru-0.5, CN/Cr<sub>2</sub>O<sub>3</sub>/Ru-1, CN/Cr<sub>2</sub>O<sub>3</sub>/Ru-5, CN/Cr<sub>2</sub>O<sub>3</sub>/Ru-10 and 20% Pt/C catalysts in 1.0 M H<sub>2</sub>SO<sub>4</sub>; (b) LSV polarization curves of CN/Cr<sub>2</sub>O<sub>3</sub>/Ru-0.5, CN/Cr<sub>2</sub>O<sub>3</sub>/Ru-1 and 20% Pt/C catalysts in Hg/Hg<sub>2</sub>SO<sub>4</sub> electrode.

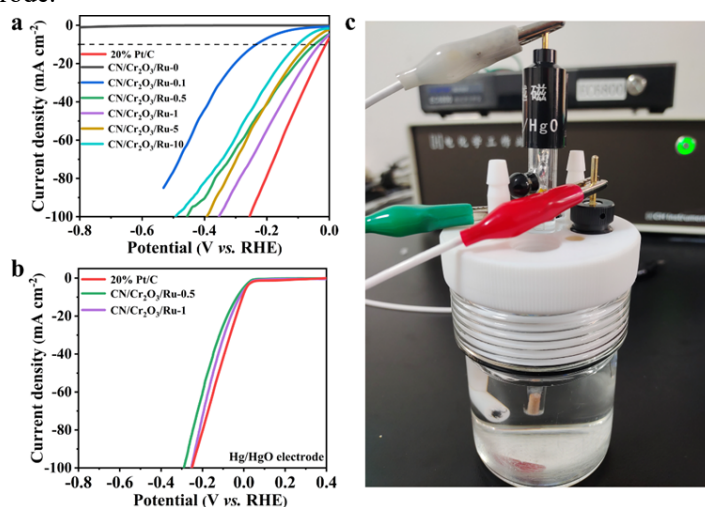

**Fig. S10.** (a) LSV polarization curves of CN/Cr<sub>2</sub>O<sub>3</sub>/Ru-0, CN/Cr<sub>2</sub>O<sub>3</sub>/Ru-0.1, CN/Cr<sub>2</sub>O<sub>3</sub>/Ru-0.5, CN/Cr<sub>2</sub>O<sub>3</sub>/Ru-1, CN/Cr<sub>2</sub>O<sub>3</sub>/Ru-5, CN/Cr<sub>2</sub>O<sub>3</sub>/Ru-10 and 20% Pt/C catalysts in 1.0 M KOH; (b) LSV polarization curves of CN/Cr<sub>2</sub>O<sub>3</sub>/Ru-0.5, CN/Cr<sub>2</sub>O<sub>3</sub>/Ru-1 and 20% Pt/C catalysts in Hg/HgO electrode; (c) Real test scenarios.

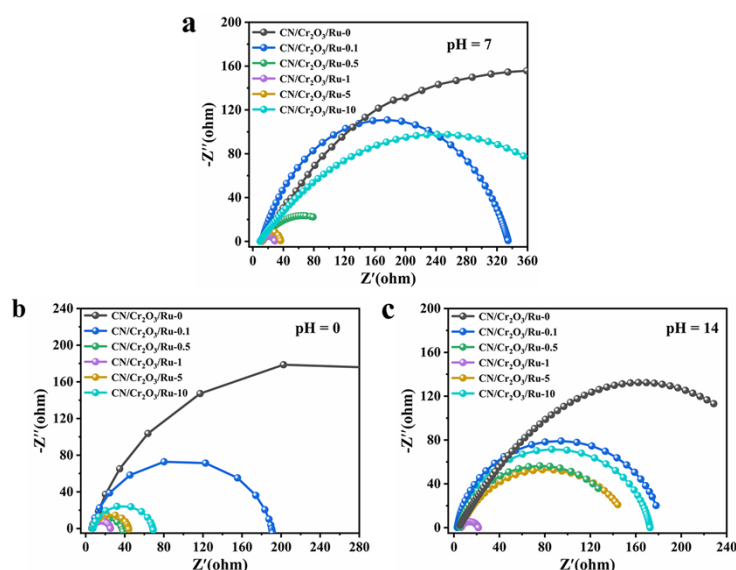

**Fig. S11.** Nyquist plots of CN/Cr<sub>2</sub>O<sub>3</sub>/Ru-0, CN/Cr<sub>2</sub>O<sub>3</sub>/Ru-0.1, CN/Cr<sub>2</sub>O<sub>3</sub>/Ru-0.5, CN/Cr<sub>2</sub>O<sub>3</sub>/Ru-1, CN/Cr<sub>2</sub>O<sub>3</sub>/Ru-5 and CN/Cr<sub>2</sub>O<sub>3</sub>/Ru-10 in (a) 1.0 M PBS, (b) 0.5 M H<sub>2</sub>SO<sub>4</sub> and (c) 1.0 M KOH.

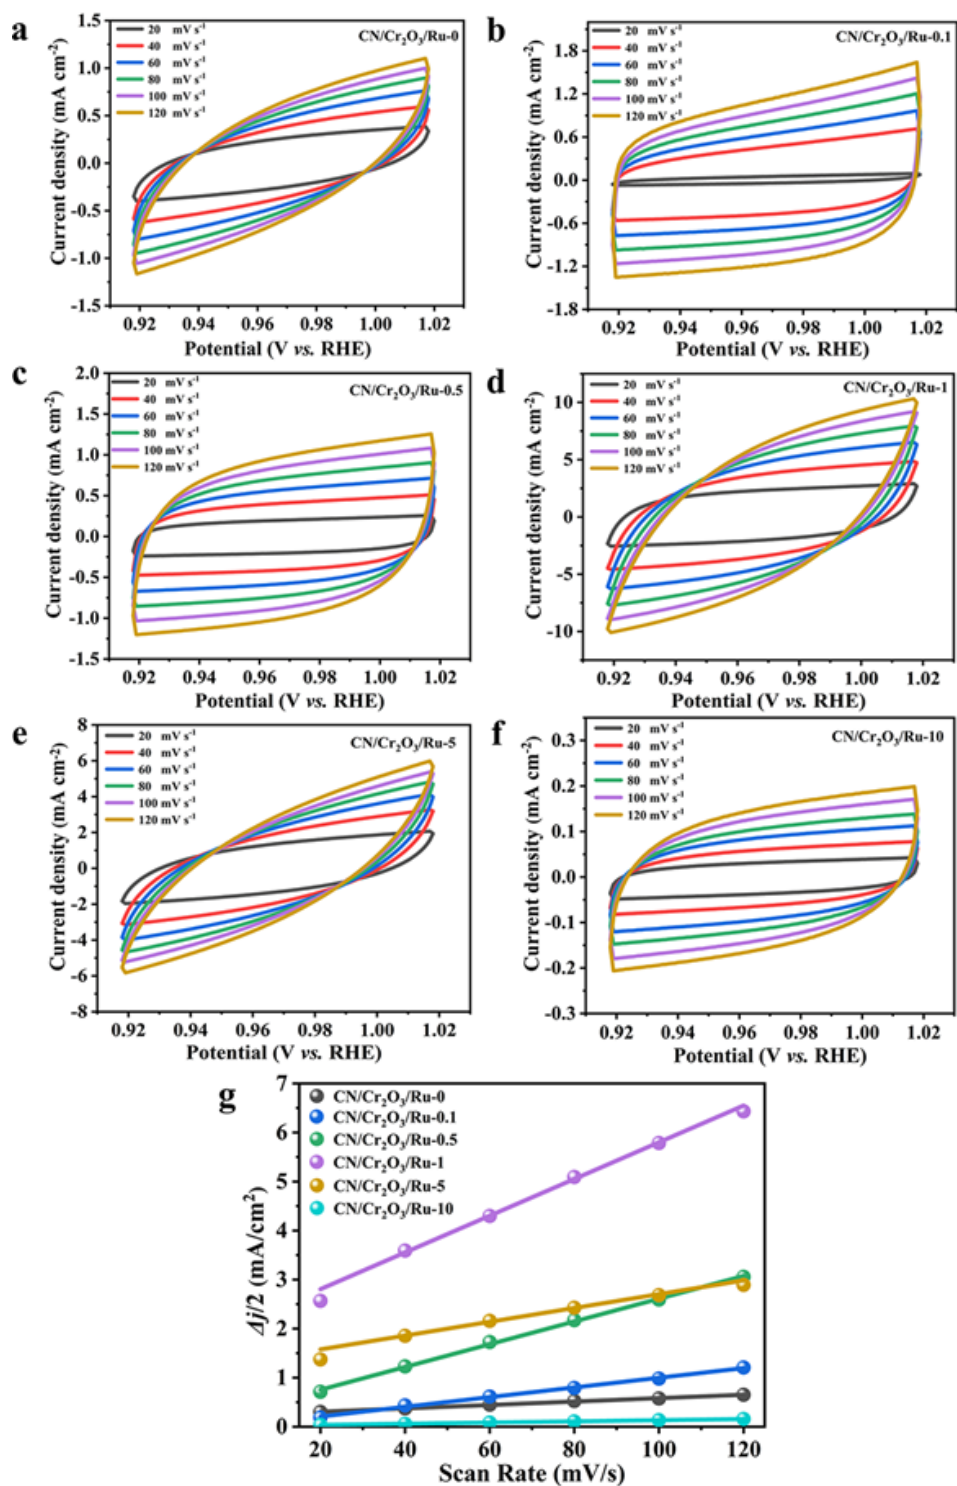

**Fig. S12.** (a-f) CV curves obtained in a potential window of 0.092-0.192 V (vs. RHE) at different scan rates in 1.0 M KOH for CN/Cr<sub>2</sub>O<sub>3</sub>/Ru-0, CN/Cr<sub>2</sub>O<sub>3</sub>/Ru-0.1, CN/Cr<sub>2</sub>O<sub>3</sub>/Ru-0.5, CN/Cr<sub>2</sub>O<sub>3</sub>/Ru-1, CN/Cr<sub>2</sub>O<sub>3</sub>/Ru-5 and CN/Cr<sub>2</sub>O<sub>3</sub>/Ru-10, respectively. (g) Charging current density plots with different scan rates for the samples.

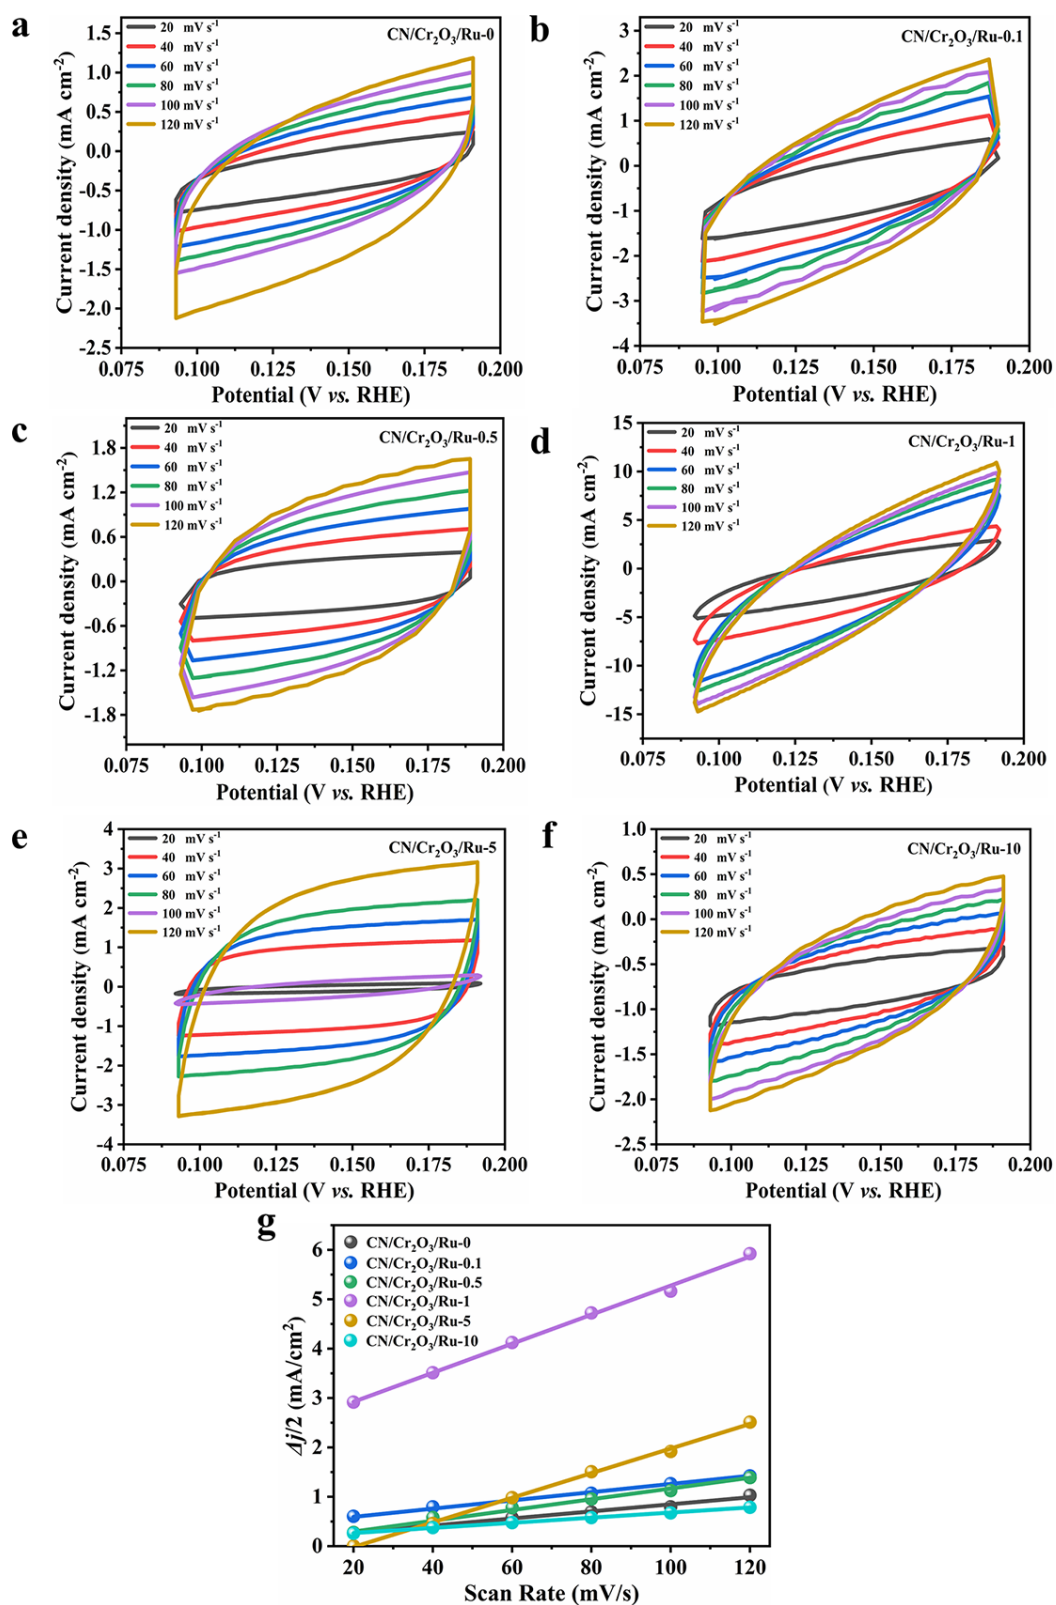

**Fig. S13.** (a-f) CV curves obtained in a potential window of 0.092-0.192 V (vs. RHE) at different scan rates in 0.5 M H<sub>2</sub>SO<sub>4</sub> for CN/Cr<sub>2</sub>O<sub>3</sub>/Ru-0, CN/Cr<sub>2</sub>O<sub>3</sub>/Ru-0.1, CN/Cr<sub>2</sub>O<sub>3</sub>/Ru-0.5, CN/Cr<sub>2</sub>O<sub>3</sub>/Ru-1, CN/Cr<sub>2</sub>O<sub>3</sub>/Ru-5 and CN/Cr<sub>2</sub>O<sub>3</sub>/Ru-10, respectively. (g) Charging current density plots with different scan rates for the samples.

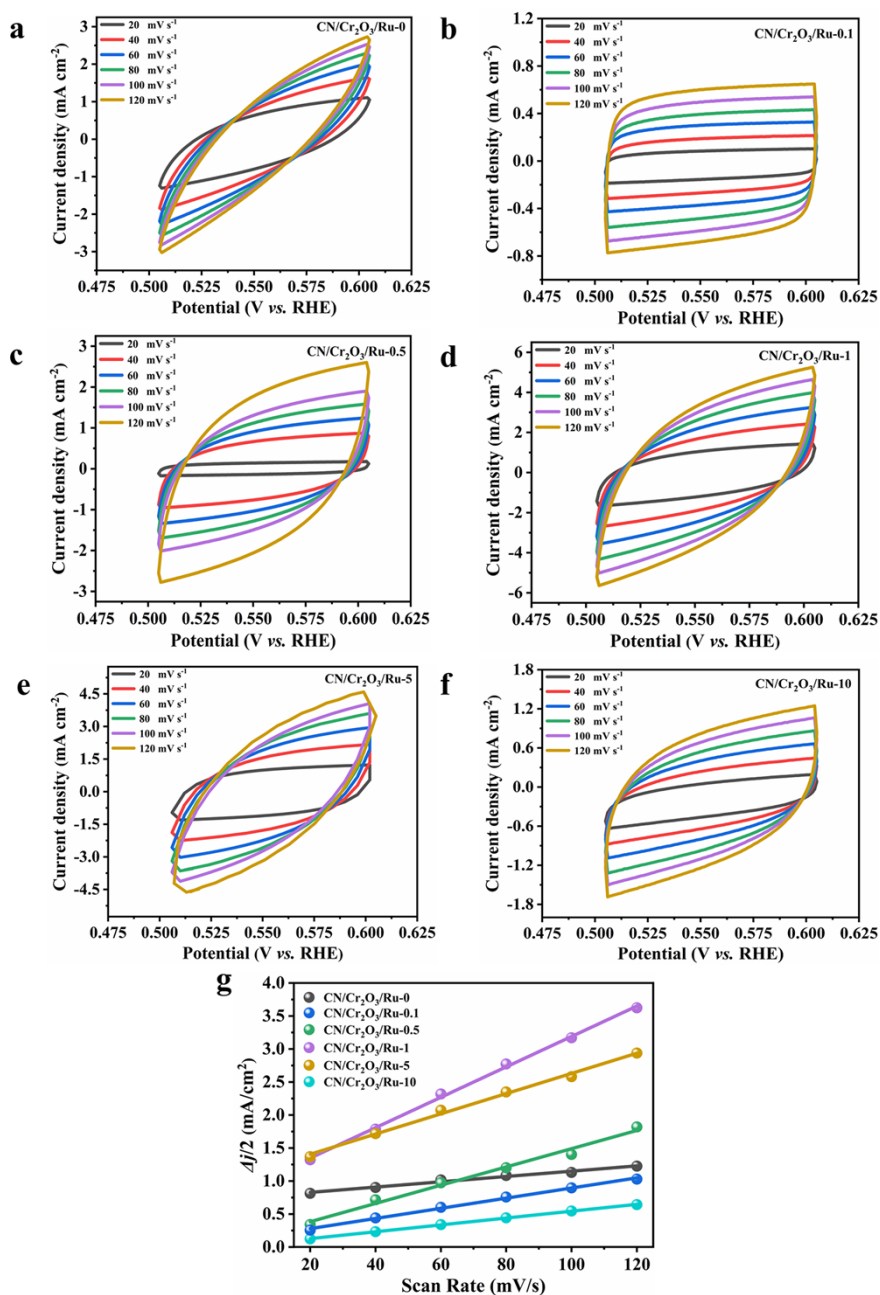

**Fig. S14.** (a-f) CV curves obtained in a potential window of 0.092-0.192 V (vs. RHE) at different scan rates in 1.0 M PBS for CN/Cr<sub>2</sub>O<sub>3</sub>/Ru-0, CN/Cr<sub>2</sub>O<sub>3</sub>/Ru-0.1, CN/Cr<sub>2</sub>O<sub>3</sub>/Ru-0.5, CN/Cr<sub>2</sub>O<sub>3</sub>/Ru-1, CN/Cr<sub>2</sub>O<sub>3</sub>/Ru-5 and CN/Cr<sub>2</sub>O<sub>3</sub>/Ru-10, respectively. (g) Charging current density plots with different scan rates for the samples.

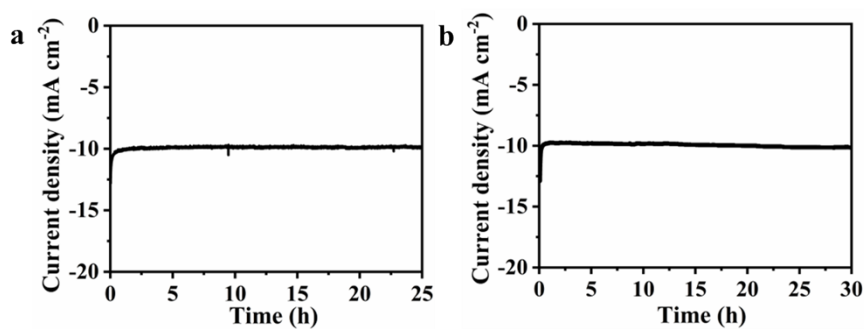

**Fig. S15.** HER stability (i-t curves) of CN/Cr<sub>2</sub>O<sub>3</sub>/Ru-1 in (a) 0.5 M H<sub>2</sub>SO<sub>4</sub>, (b) 1.0 M PBS.

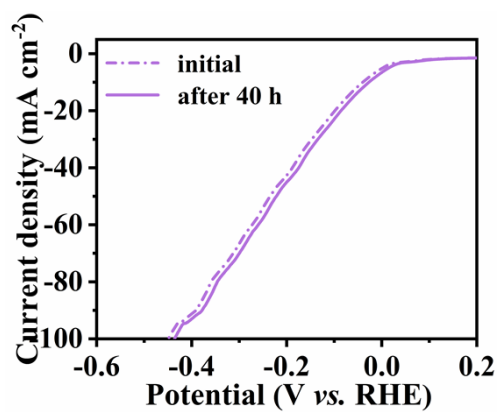

Fig. S16. the LSV curves before and after the durability test.

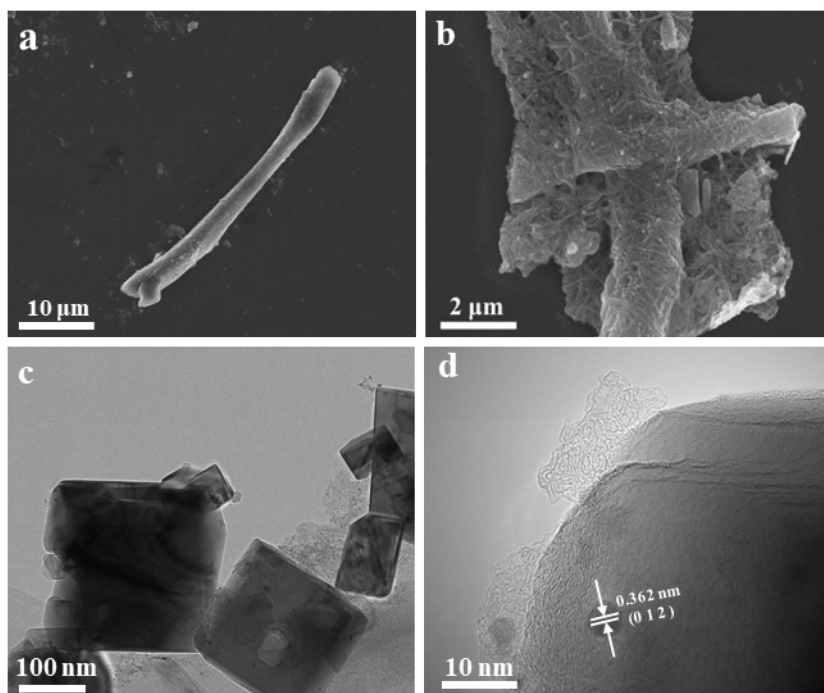

Fig. S17. (a) and (b) SEM images of CN/Cr<sub>2</sub>O<sub>3</sub>/Ru-1 after the durability test in 1.0 M KOH. (c) and (d) SEM images of CN/Cr<sub>2</sub>O<sub>3</sub>/Ru-1 after the durability test in 1.0 M KOH.

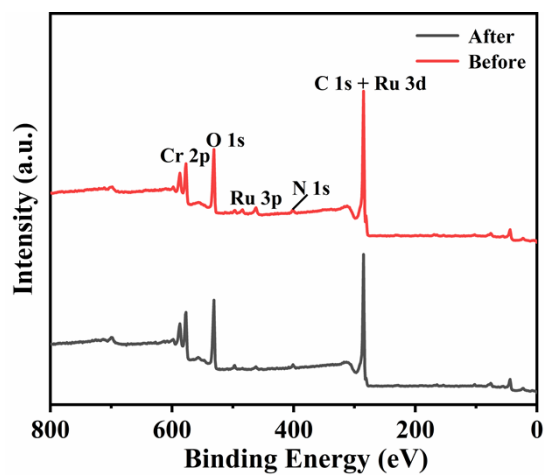

Fig. S18. XPS survey spectra of CN/Cr<sub>2</sub>O<sub>3</sub>/Ru-1 before and after stability test in 1.0 M KOH.



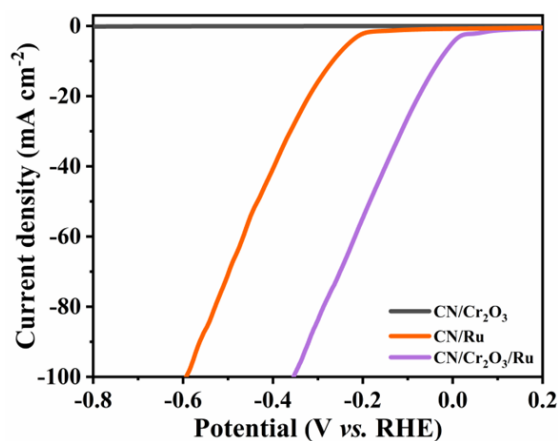

Fig. S19. Comparison of HER performance of three catalysts.

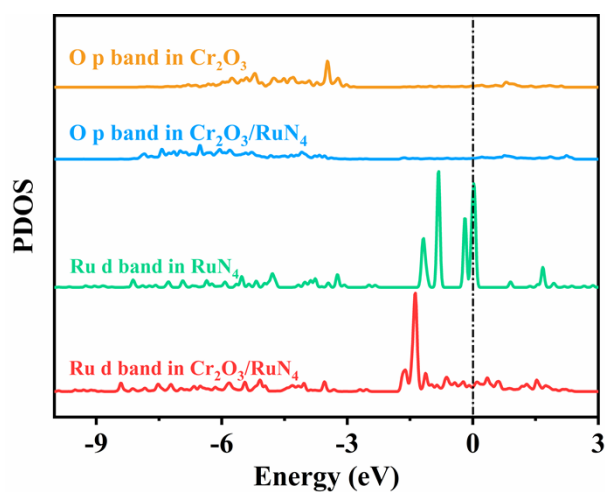

Fig. S20. Calculated PDOS of  $\text{Cr}_2\text{O}_3$ ,  $\text{Cr}_2\text{O}_3/\text{RuN}_4$ ,  $\text{RuN}_4$ .

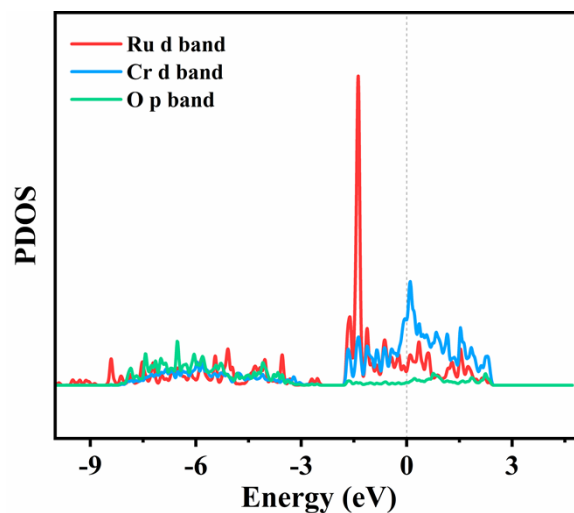

Fig. S21. PDOS of Ru d band, Cr d band and O p band electrons.

**Table S1.** Elemental contents (wt%) detected by XPS.

| Samples                            | $S_{\text{BET}}$ ( $\text{m}^2 \text{g}^{-1}$ ) | Pore volumes ( $\text{cm}^3 \text{g}^{-1}$ ) |
|------------------------------------|-------------------------------------------------|----------------------------------------------|
| CN/ $\text{Cr}_2\text{O}_3$ /Ru-0  | 332.5                                           | 0.25                                         |
| CN/ $\text{Cr}_2\text{O}_3$ /Ru-1  | 843.8                                           | 0.49                                         |
| CN/ $\text{Cr}_2\text{O}_3$ /Ru-10 | 518.8                                           | 0.33                                         |

**Table S2.** Elemental contents (wt%) detected by XPS.

| Samples                                   | C     | N    | O     | Cr   | Ru   |
|-------------------------------------------|-------|------|-------|------|------|
| CN/Cr <sub>2</sub> O <sub>3</sub> /Ru-0   | 84.46 | 2.25 | 11.51 | 1.78 | 0    |
| CN/Cr <sub>2</sub> O <sub>3</sub> /Ru-0.1 | 77.33 | 2.41 | 16.49 | 3.27 | 0.5  |
| CN/Cr <sub>2</sub> O <sub>3</sub> /Ru-0.5 | 82.1  | 1.93 | 11.93 | 2.97 | 1.07 |
| CN/Cr <sub>2</sub> O <sub>3</sub> /Ru-1   | 78.64 | 2.04 | 13.69 | 2.9  | 2.74 |
| CN/Cr <sub>2</sub> O <sub>3</sub> /Ru-5   | 75.33 | 2.41 | 14.49 | 2.27 | 5.5  |
| CN/Cr <sub>2</sub> O <sub>3</sub> /Ru-10  | 75.96 | 1.95 | 10.99 | 2.15 | 8.95 |

**Table S3.** EXAFS fitting parameters at the Ru K-edge for various samples ( $S_0^2=0.78$ )

| Sample           | Shell         | CN <sup>a</sup> | R(Å) <sup>b</sup> | $\sigma^2(\text{Å}^2)$ <sup>c</sup> | $\Delta E_0(\text{eV})$ <sup>d</sup> | R factor      |
|------------------|---------------|-----------------|-------------------|-------------------------------------|--------------------------------------|---------------|
| Ru foil          | Ru-Ru         | 12*             | 2.68±0.01         | 0.0042                              | 3.8                                  | 0.0072        |
|                  | Ru-O          | 6.0±0.4         | 1.96±0.01         | 0.0015                              | -3.9                                 |               |
| RuO <sub>2</sub> | Ru-Ru         | 6.0±0.8         | 3.12±0.01         | 0.0072                              | -8.9                                 | 0.0149        |
|                  | Ru-Ru         | 6.1±0.3         | 3.58±0.01         | 0.0013                              | 2.2                                  |               |
|                  | <b>Ru-C/N</b> | <b>4.0±0.4</b>  | <b>2.02±0.01</b>  | <b>0.0029</b>                       | <b>-12.9</b>                         |               |
| <b>Ru sample</b> | <b>Ru-Cl</b>  | <b>1.8±0.2</b>  | <b>2.41±0.01</b>  | <b>0.0043</b>                       | <b>11.7</b>                          | <b>0.0196</b> |
|                  | <b>Ru-Ru</b>  | <b>1.0±0.2</b>  | <b>2.63±0.01</b>  | <b>0.0057</b>                       | <b>14.7</b>                          |               |

<sup>a</sup>CN, coordination number; <sup>b</sup>R, distance between absorber and backscatter atoms; <sup>c</sup> $\sigma^2$ , Debye-Waller factor to account for both thermal and structural disorders; <sup>d</sup> $\Delta E_0$ , inner potential correction; R factor indicates the goodness of the fit.  $S_0^2$  was fixed to 0.78, according to the experimental EXAFS fit of Ru foil by fixing CN as the known crystallographic value.

**Table S4.** A comparison of overpotentials (mV) at 10 mA/cm<sup>2</sup>

| Medium                               | Reference electrode                | Pt/C | CN/Cr <sub>2</sub> O <sub>3</sub> /Ru-0.5 | CN/Cr <sub>2</sub> O <sub>3</sub> /Ru-1 |
|--------------------------------------|------------------------------------|------|-------------------------------------------|-----------------------------------------|
| 1.0 M KOH                            | Hg/Hg <sub>2</sub> Cl <sub>2</sub> | 12   | 47                                        | 28                                      |
|                                      | Hg/HgO                             | 11   | 40                                        | 24                                      |
| 0.5 M H <sub>2</sub> SO <sub>4</sub> | Hg/Hg <sub>2</sub> Cl <sub>2</sub> | 10   | 96                                        | 58                                      |
|                                      | Hg/Hg <sub>2</sub> SO <sub>4</sub> | 14   | 97                                        | 47                                      |

**Table S5.** ICP-OES analysis of dissolved Ru and Cr ions after stability test in 1.0 M KOH.

| Sample amount                 | 2 mg  | 4 mg  | 5 mg  |
|-------------------------------|-------|-------|-------|
| Concentration of Ru ion (ppb) | 0.18  | 0.25  | 0.49  |
| Concentration of Cr ion (ppb) | 0.24  | 0.45  | 0.77  |
| Loss of mass (Ru)             | 3.51% | 2.44% | 1.91% |
| Loss of mass (Cr)             | 4.83% | 4.53% | 6.2%  |
| Average mass loss (Ru)        |       | 2.62% |       |
| Average mass loss (Cr)        |       | 5.18% |       |

**Table S6.** Comparison of HER performances of Ru-based catalysts.

| No. | Catalyst                                    | $\eta_{10}$ (mV) | Reference                                           |
|-----|---------------------------------------------|------------------|-----------------------------------------------------|
| 1   | Ru SAs/Ru PNs                               | 23               | Int. J. Hydrogen Energy. 2020, 18840-18849.         |
| 2   | RuAu-0.2                                    | 24               | Adv. Energy Mater. 2019, 9, 1803913.                |
| 3   | CN/Cr <sub>2</sub> O <sub>3</sub> /Ru-1     | 28               | This work                                           |
| 4   | RuCo alloy                                  | 28               | Nat. Commun. 2017, 8, 14969                         |
| 5   | NiRu alloy                                  | 32               | J. Mater. Chem. A. 2018, 6, 1376-1381.              |
| 6   | Ru <sub>NP</sub> -Ru <sub>SA</sub> @CFN-800 | 33               | Adv. Funct. Mater. 2023, 33, 2213058.               |
| 7   | Ru SAs/N-Mo <sub>2</sub> C NSs              | 43               | Appl. Catal. B., 2020, 277, 119236.                 |
| 8   | CoRu@NC                                     | 45               | Nanotechnology. 2018, 29, 225403.                   |
| 9   | Ru <sub>2</sub> P@PNC/CC-900                | 50               | ACS Appl. Energy Mater. 2018, 1, 314-3150.          |
| 10  | Ru <sub>1</sub> CoP/CDs-1000                | 51               | Angew. Chem. Int. Ed. 2021, 60, 7234-7244.          |
| 11  | Ru <sub>0.10</sub> @2H-MoS <sub>2</sub>     | 51               | Appl. Catal. B-Environ. 2021, 298, 120490.          |
| 12  | RuP <sub>2</sub> @NPC                       | 52               | Angew. Chem. Int. Ed. 2017, 56, 11559-11564.        |
| 13  | Ru/Co <sub>4</sub> N-CoF <sub>2</sub>       | 53               | Chem. Eng. J. 2021, 414, 128865.                    |
| 14  | ah-RuO <sub>2</sub> @C                      | 63               | Nano Energy. 2019, 55, 49-58.                       |
| 15  | CF@Ru-CoCH NWs                              | 66               | Electrochim. Acta. 2020, 331, 135367.               |
| 16  | RuP <sub>x</sub> @NPC                       | 74               | ChemSusChem. 2018, 11, 743-752.                     |
| 17  | Ru SAs/ECM                                  | 83               | Adv. Energy Mater. 2020, 10, 2000882.               |
| 18  | CoRu-O/A@HNC-2                              | 85               | ACS Appl. Mater. Interfaces. 2020, 12, 51437-51447. |
| 19  | Ru-WSe <sub>2</sub>                         | 87               | Inorg. Chem. Front. 2019, 6, 1382-1387.             |
| 20  | Ru-MoS <sub>2</sub> /CC                     | 90               | NEW J. CHEM. 2022, 46, 1912-1920.                   |
| 21  | Ru NPs/Mo <sub>2</sub> C NSs                | 95               | Appl. Catal. B. 2020, 277, 119236.                  |
| 22  | RuO <sub>2</sub> -NWs@g-CN                  | 95               | ACS Appl. Mater. Interfaces 2016, 8, 28678-28688.   |
| 23  | Ru/Y(OH) <sub>3</sub>                       | 100              | Chem. Commun. 2018, 54, 12202-12205.                |
| 24  | SrRuO <sub>3</sub> /CNT                     | 110              | ACS Appl Energy Mater. 2019, 2, 956-960.            |
| 25  | Ru-VN-2                                     | 144              | ChemElectroChem. 2020, 7, 1201-1206.                |
